# Supplementary material for: Optimizing Manufacturing Parameters of DLP Machine by Taguchi Method and Desirability Approach
Source: MDPI journal article supplement (doi:10.3390/machines10100901), 2022-10-06
Supplement: s1 [file s1]

## Supplementary Materials

Table S1

Factor response table of aperture

|                    | Control factors |       |       |       |
|--------------------|-----------------|-------|-------|-------|
|                    | A               | B     | C     | D     |
| Level 1            | 56.01           | 51.71 | 52.81 | 51.97 |
| Level 2            | 53.80           | 58.34 | 60.35 | 56.88 |
| Level 3            | 52.75           | 52.51 | 49.40 | 53.71 |
| Maximum difference | 3.25            | 6.63  | 10.96 | 4.91  |

Table S2

Factor response table of addendum circle

|                    | Control factors |       |       |       |
|--------------------|-----------------|-------|-------|-------|
|                    | A               | B     | C     | D     |
| Level 1            | 55.55           | 55.53 | 61.82 | 61.47 |
| Level 2            | 51.33           | 52.87 | 59.31 | 50.35 |
| Level 3            | 63.57           | 62.06 | 49.33 | 58.64 |
| Maximum difference | 12.24           | 9.19  | 12.48 | 11.12 |

Table S3

Factor response table of dedendum circle

|                    | Control factors |       |       |       |
|--------------------|-----------------|-------|-------|-------|
|                    | A               | B     | C     | D     |
| Level 1            | 57.93           | 56.01 | 59.97 | 57.63 |
| Level 2            | 60.08           | 62.42 | 52.26 | 56.74 |
| Level 3            | 56.51           | 56.09 | 62.29 | 60.14 |
| Maximum difference | 3.57            | 6.41  | 10.04 | 3.40  |

Table S4

Factor response table of surface width

|                    | Control factors |       |       |       |
|--------------------|-----------------|-------|-------|-------|
|                    | A               | B     | C     | D     |
| Level 1            | 34.27           | 37.89 | 35.45 | 38.56 |
| Level 2            | 39.37           | 39.69 | 42.12 | 39.30 |
| Level 3            | 40.42           | 36.48 | 36.48 | 36.21 |
| Maximum difference | 6.15            | 3.21  | 6.67  | 3.09  |

Table S5

ANOVA of aperture

| Factor | <i>dof</i> | <i>SS</i> | <i>V</i> | <i>SS'</i> | $\rho$ |
|--------|------------|-----------|----------|------------|--------|
| A      | 2          | 16.57     | 8.29     | 16.57      | 5.16%  |
| B      | 2          | 78.74     | 39.37    | 78.75      | 24.53% |
| C      | 2          | 188.60    | 94.30    | 188.60     | 58.74% |
| D      | 2          | 37.13     | 18.57    | 37.13      | 11.57% |
| Total  | 8          | 321.05    | -        | 321.05     | 100%   |

Table S6

ANOVA of addendum circle

| Factor | <i>dof</i> | <i>SS</i> | <i>V</i> | <i>SS'</i> | $\rho$ |
|--------|------------|-----------|----------|------------|--------|
| A      | 2          | 231.80    | 115.91   | 231.82     | 28.00% |
| B      | 2          | 134.20    | 67.08    | 134.15     | 16.21% |
| C      | 2          | 261.70    | 130.83   | 261.66     | 31.61% |
| D      | 2          | 200.40    | 100.19   | 200.38     | 24.20% |
| Total  | 8          | 828       | -        | 828.01     | 100%   |

Table S7

ANOVA of dedendum circle

| Factor | <i>dof</i> | <i>SS</i> | <i>V</i> | <i>SS'</i> | $\rho$ |
|--------|------------|-----------|----------|------------|--------|
| A      | 2          | 19.37     | 9.68     | 19.37      | 6.81%  |
| B      | 2          | 81.08     | 40.54    | 81.08      | 28.49% |
| C      | 2          | 165.57    | 82.78    | 165.57     | 58.17% |
| D      | 2          | 18.60     | 9.30     | 18.60      | 6.54%  |
| Total  | 8          | 284.61    | -        | 284.61     | 100%   |

Table S8

ANOVA of surface width

| Factor | <i>dof</i> | <i>SS</i> | <i>V</i> | <i>SS'</i> | $\rho$ |
|--------|------------|-----------|----------|------------|--------|
| A      | 2          | 65.03     | 32.52    | 65.03      | 37.48% |
| B      | 2          | 15.49     | 7.75     | 15.49      | 8.93%  |
| C      | 2          | 77.39     | 38.69    | 77.39      | 44.60% |
| D      | 2          | 15.60     | 7.80     | 15.60      | 8.99%  |
| Total  | 8          | 173.52    | -        | 173.52     | 100%   |
